# Supplementary material
Source: PubMed Central journal article supplement (PMC3389193)
Supplement: NIHMS373947-supplement-02.pdf [file NIHMS373947-supplement-02.pdf]

**Patient Follow-Up by Visit and Treatment Groups (Year 2 Cohort)**  
(as of December 31, 2011)

| Week | Treatment Groups    |       |             |                      |       |             |                       |       |             |                     |       |             |                      |       |             |                       |       |             |
|------|---------------------|-------|-------------|----------------------|-------|-------------|-----------------------|-------|-------------|---------------------|-------|-------------|----------------------|-------|-------------|-----------------------|-------|-------------|
|      | Ranibizumab Monthly |       |             | Ranibizumab Switched |       |             | Ranibizumab As Needed |       |             | Bevacizumab Monthly |       |             | Beverizumab Switched |       |             | Beverizumab As Needed |       |             |
|      | Expected            | #     | Completed % | Expected             | #     | Completed % | Expected              | #     | Completed % | Expected            | #     | Completed % | Expected             | #     | Completed % | Expected              | #     | Completed % |
| All  | 3,778               | 3,352 | (88.7)      | 3,539                | 3,250 | (91.8)      | 7,393                 | 6,778 | (91.7)      | 3,497               | 3,213 | (91.9)      | 3,364                | 3,085 | (91.7)      | 6,952                 | 6,347 | (91.3)      |
| 004  | 146                 | 145   | (99.3)      | 137                  | 134   | (97.8)      | 287                   | 284   | (99.0)      | 135                 | 134   | (99.3)      | 131                  | 127   | (96.9)      | 269                   | 266   | (98.9)      |
| 008  | 146                 | 140   | (95.9)      | 137                  | 131   | (95.6)      | 287                   | 280   | (97.6)      | 135                 | 132   | (97.8)      | 131                  | 125   | (95.4)      | 269                   | 261   | (97.0)      |
| 012  | 146                 | 134   | (91.8)      | 137                  | 127   | (92.7)      | 287                   | 269   | (93.7)      | 135                 | 130   | (96.3)      | 131                  | 117   | (89.3)      | 269                   | 251   | (93.3)      |
| 016  | 146                 | 136   | (93.2)      | 137                  | 131   | (95.6)      | 287                   | 265   | (92.3)      | 135                 | 123   | (91.1)      | 131                  | 124   | (94.7)      | 269                   | 246   | (91.4)      |
| 020  | 146                 | 132   | (90.4)      | 137                  | 127   | (92.7)      | 287                   | 258   | (89.9)      | 135                 | 128   | (94.8)      | 131                  | 126   | (96.2)      | 269                   | 249   | (92.6)      |
| 024  | 146                 | 131   | (89.7)      | 138                  | 129   | (93.5)      | 287                   | 267   | (93.0)      | 135                 | 120   | (88.9)      | 131                  | 122   | (93.1)      | 270                   | 249   | (92.2)      |
| 028  | 146                 | 128   | (87.7)      | 137                  | 124   | (90.5)      | 287                   | 267   | (93.0)      | 135                 | 124   | (91.9)      | 131                  | 119   | (90.8)      | 269                   | 255   | (94.8)      |
| 032  | 146                 | 131   | (89.7)      | 137                  | 126   | (92.0)      | 287                   | 264   | (92.0)      | 135                 | 128   | (94.8)      | 131                  | 120   | (91.6)      | 269                   | 247   | (91.8)      |
| 036  | 146                 | 131   | (89.7)      | 137                  | 127   | (92.7)      | 287                   | 264   | (92.0)      | 135                 | 120   | (88.9)      | 131                  | 124   | (94.7)      | 269                   | 243   | (90.3)      |
| 040  | 146                 | 138   | (94.5)      | 137                  | 116   | (84.7)      | 287                   | 259   | (90.2)      | 135                 | 128   | (94.8)      | 131                  | 118   | (90.1)      | 269                   | 242   | (90.0)      |
| 044  | 146                 | 134   | (91.8)      | 137                  | 127   | (92.7)      | 287                   | 270   | (94.1)      | 135                 | 121   | (89.6)      | 131                  | 118   | (90.1)      | 269                   | 247   | (91.8)      |
| 048  | 146                 | 125   | (85.6)      | 137                  | 126   | (92.0)      | 287                   | 263   | (91.6)      | 135                 | 123   | (91.1)      | 131                  | 118   | (90.1)      | 269                   | 243   | (90.3)      |
| 052  | 146                 | 141   | (96.6)      | 138                  | 134   | (97.1)      | 287                   | 274   | (95.5)      | 135                 | 129   | (95.6)      | 131                  | 126   | (96.2)      | 270                   | 258   | (95.6)      |
| 056  | 146                 | 127   | (87.0)      | 137                  | 128   | (93.4)      | 287                   | 263   | (91.6)      | 135                 | 126   | (93.3)      | 130                  | 115   | (88.5)      | 268                   | 239   | (89.2)      |
| 060  | 146                 | 123   | (84.2)      | 137                  | 123   | (89.8)      | 287                   | 260   | (90.6)      | 135                 | 121   | (89.6)      | 130                  | 116   | (89.2)      | 268                   | 244   | (91.0)      |
| 064  | 146                 | 129   | (88.4)      | 137                  | 121   | (88.3)      | 286                   | 266   | (93.0)      | 135                 | 119   | (88.1)      | 129                  | 117   | (90.7)      | 267                   | 231   | (86.5)      |
| 068  | 146                 | 118   | (80.8)      | 137                  | 131   | (95.6)      | 285                   | 253   | (88.8)      | 134                 | 118   | (88.1)      | 129                  | 120   | (93.0)      | 267                   | 247   | (92.5)      |
| 072  | 145                 | 124   | (85.5)      | 136                  | 120   | (88.2)      | 283                   | 249   | (88.0)      | 134                 | 123   | (91.8)      | 127                  | 116   | (91.3)      | 267                   | 242   | (90.6)      |
| 076  | 145                 | 124   | (85.5)      | 137                  | 122   | (89.1)      | 282                   | 255   | (90.4)      | 134                 | 121   | (90.3)      | 127                  | 120   | (94.5)      | 268                   | 241   | (89.9)      |
| 080  | 145                 | 122   | (84.1)      | 135                  | 123   | (91.1)      | 281                   | 253   | (90.0)      | 134                 | 116   | (86.6)      | 127                  | 114   | (89.8)      | 267                   | 234   | (87.6)      |
| 084  | 145                 | 125   | (86.2)      | 134                  | 119   | (88.8)      | 281                   | 247   | (87.9)      | 134                 | 123   | (91.8)      | 127                  | 115   | (90.6)      | 266                   | 235   | (88.3)      |
| 088  | 144                 | 124   | (86.1)      | 133                  | 117   | (88.0)      | 280                   | 247   | (88.2)      | 134                 | 116   | (86.6)      | 127                  | 111   | (87.4)      | 265                   | 229   | (86.4)      |
| 092  | 144                 | 123   | (85.4)      | 133                  | 117   | (88.0)      | 279                   | 251   | (90.0)      | 134                 | 122   | (91.0)      | 127                  | 111   | (87.4)      | 265                   | 234   | (88.3)      |
| 096  | 144                 | 118   | (81.9)      | 133                  | 119   | (89.5)      | 279                   | 241   | (86.4)      | 133                 | 120   | (90.2)      | 127                  | 112   | (88.2)      | 263                   | 233   | (88.6)      |
| 100  | 143                 | 115   | (80.4)      | 133                  | 121   | (91.0)      | 278                   | 245   | (88.1)      | 133                 | 119   | (89.5)      | 127                  | 112   | (88.2)      | 262                   | 230   | (87.8)      |
| 104  | 141                 | 134   | (95.0)      | 134                  | 130   | (97.0)      | 274                   | 264   | (96.4)      | 133                 | 129   | (97.0)      | 127                  | 122   | (96.1)      | 260                   | 251   | (96.5)      |

**Extended Week 104\* Visual Acuity Summary (Year 2 Cohort)**  
(as of December 31, 2011)

|       |   | No.      | Visual Acuity Performed Within the Visit Window (%) |        |       |       |
|-------|---|----------|-----------------------------------------------------|--------|-------|-------|
|       |   | Week 104 |                                                     |        |       |       |
|       |   | VA Exams | 104                                                 | 108    | 112   | 116   |
| Total |   | 1,030    | (80.1)                                              | (17.7) | (1.7) | (0.6) |
| Group | 1 | 134      | (80.6)                                              | (17.9) | (0.7) | (0.7) |
|       | 2 | 130      | (76.9)                                              | (20.0) | (2.3) | (0.8) |
|       | 3 | 264      | (80.7)                                              | (17.4) | (1.5) | (0.4) |
|       | 4 | 129      | (81.4)                                              | (15.5) | (0.8) | (2.3) |
|       | 5 | 122      | (84.4)                                              | (13.9) | (1.6) | (0.0) |
|       | 6 | 251      | (78.1)                                              | (19.5) | (2.4) | (0.0) |
| Drug  | 1 | 528      | (79.7)                                              | (18.2) | (1.5) | (0.6) |
|       | 2 | 502      | (80.5)                                              | (17.1) | (1.8) | (0.6) |

\* In order to minimize missing data on the primary outcome measure, the time window for the Week 104 Visit was extended through week 118, the end of the time window for a visit with an ideal date 3 months after 104 weeks. Time windows are ideal data  $\pm$  14 days.
